# Supplementary material for: Cryptolepine Suppresses Colorectal Cancer Cell Proliferation, Stemness, and Metastatic Processes by Inhibiting WNT/β-Catenin Signaling
Source: MDPI journal article supplement (doi:10.3390/ph16071026), 2023-07-19
Supplement: s1 [file s1]

# Cryptolepine Suppresses Colorectal Cancer Cell Proliferation, Stemness and Metastatic Processes by Inhibiting WNT/ $\beta$ -Catenin Signaling

Jude Tetteh Quarshie, Kwadwo Fosu, Nicholas Awuku Offei, Augustine Kojo Sobo, Osbourne Quaye and Anastasia Rosebud Aikins \*

West African Centre for Cell Biology of Infectious Pathogens (WACCBIP), Department of Biochemistry Cell and Molecular Biology, University of Ghana, Accra P.O. Box LG 54, Ghana;  
 judequarshie.pub@gmail.com (J.T.Q.); kfosu004@st.ug.edu.gh (K.F.); offeinicholas23@gmail.com (N.A.O.); aksobo@st.ug.edu.gh (A.K.S.); oquaye@ug.edu.gh (O.Q.)

\* Correspondence: araikins@ug.edu.gh

**Table S1: Sequences and annealing temperatures of primers.**

| Gene          | Primer Sequences       |                           | Annealing temperature (°C) |
|---------------|------------------------|---------------------------|----------------------------|
|               | Forward                | Reverse                   |                            |
| <i>GAPDH</i>  | GGAGCGAGATCCCTCCAAAAT  | GGCTGTTGTCATACTTCTCATGG   | 56                         |
| <i>CTNNB1</i> | CTTCACCTGACAGATCCAAGTC | CCTTCCATCCCTTCCTGTTTAG    | 58                         |
| <i>WISP1</i>  | ACTCATTAAGGCAGGGAAGAAG | CCACAGTACTTGGGTTGATAGG    | 58                         |
| <i>c-MYC</i>  | AAGCTGAGGCACACAAAGA    | GCTTGGACAGGTTAGGAGTAAA    | 58                         |
| <i>OCT4</i>   | GTGGAGGAAGCTGACAACAA   | CAGGTTTTCTTCCCTAGCT       | 56                         |
| <i>CD133</i>  | ACATGAAAAGACCTGGGGG    | GATCTGGTGTCCCAGCATG       | 55                         |
| <i>TWIST1</i> | AGGCATCACTATGGACTTTCTC | GGCCAGTTTGATCCCAGTAT      | 58                         |
| <i>SNAI1</i>  | CCACGAGGTGTGACTAACTATG | ACCAAACAGGAGGCTGAAATA     | 56                         |
| <i>MMP2</i>   | CTCATCGCAGATGCCTGGAA   | TTCAGGTAATAGGCACCCTTGAAGA | 60                         |
| <i>MMP9</i>   | ACGCACGACGTCTTCCAGTA   | CCACCTGGTTCAACTCACTCC     | 60                         |
